# Supplementary material for: Dispersion engineering of cellulose nanofibres in polyols: for controlled microstructure of high-performance polyurethane foam
Source: Royal Society of Chemistry journal article supplement (doi:10.1039/d3ma00865g), 2024-01-01
Supplement: d3ma00865g1.pdf [file d3ma00865g1.pdf]

## Supporting Information

# Dispersion Engineering of Cellulose Nanofibres in Polyols: For Controlled Microstructure of High-performance Polyurethane Insulation Foam

Hima Haridevan<sup>a,b</sup>, David A.C. Evans<sup>b</sup>, Darren J. Martin<sup>a</sup>, Pratheep K. Annamalai<sup>b,c,d,e</sup>\*

<sup>a</sup> School of Chemical Engineering, The University of Queensland, Brisbane, Queensland 4072, Australia

<sup>b</sup> Australian Institute for Bioengineering and Nanotechnology, The University of Queensland, Brisbane, Queensland 4072, Australia

<sup>c</sup> School of Agriculture and Food Sustainability, The University of Queensland, Brisbane, Queensland 4072, Australia

<sup>d</sup> Centre of Future Materials, University of Southern Queensland, Toowoomba, Queensland 4350, Australia

<sup>e</sup> School of Agriculture and Environmental Science, University of Southern Queensland, Toowoomba, Queensland 4350, Australia

\* Corresponding author: [p.annamalai@uq.edu.au](mailto:p.annamalai@uq.edu.au)

### S.1 CNF/polyurethane Resin Properties

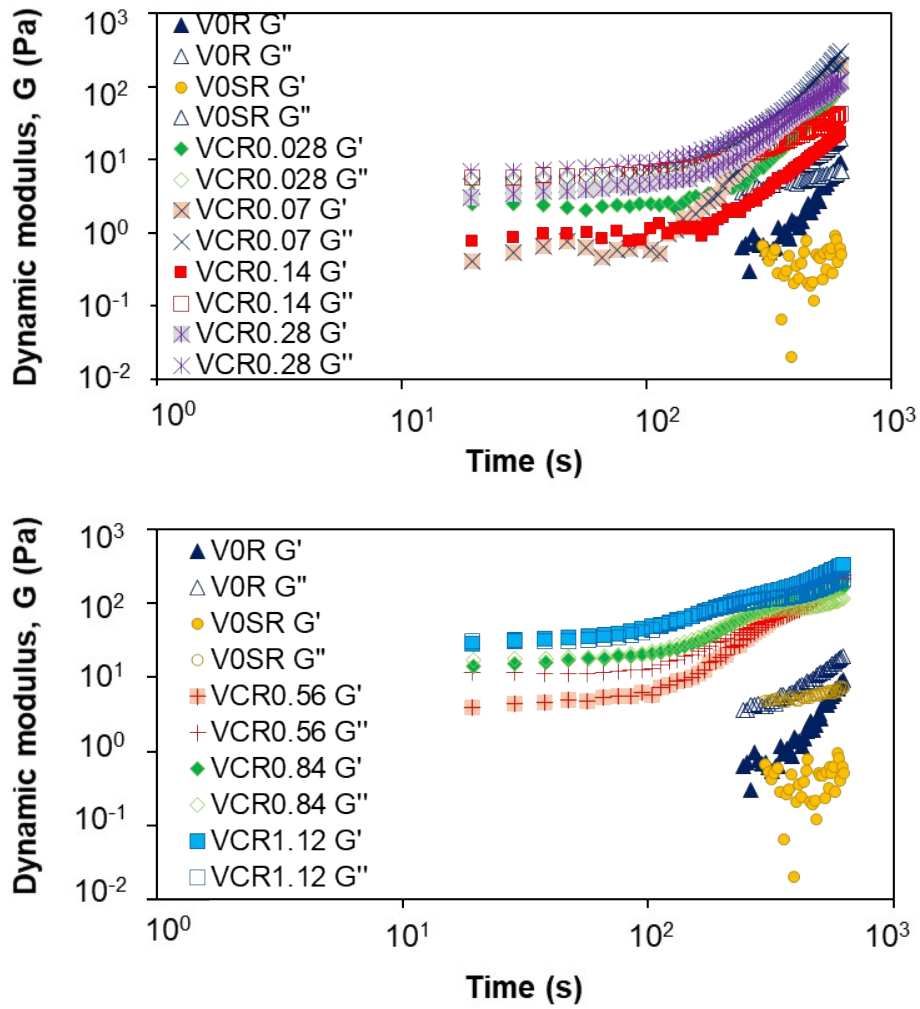

**Figure S.1.** Dynamic modulus of CNF/polyurethane resins a) at low loadings and b) high loadings (the graph includes mixing time).

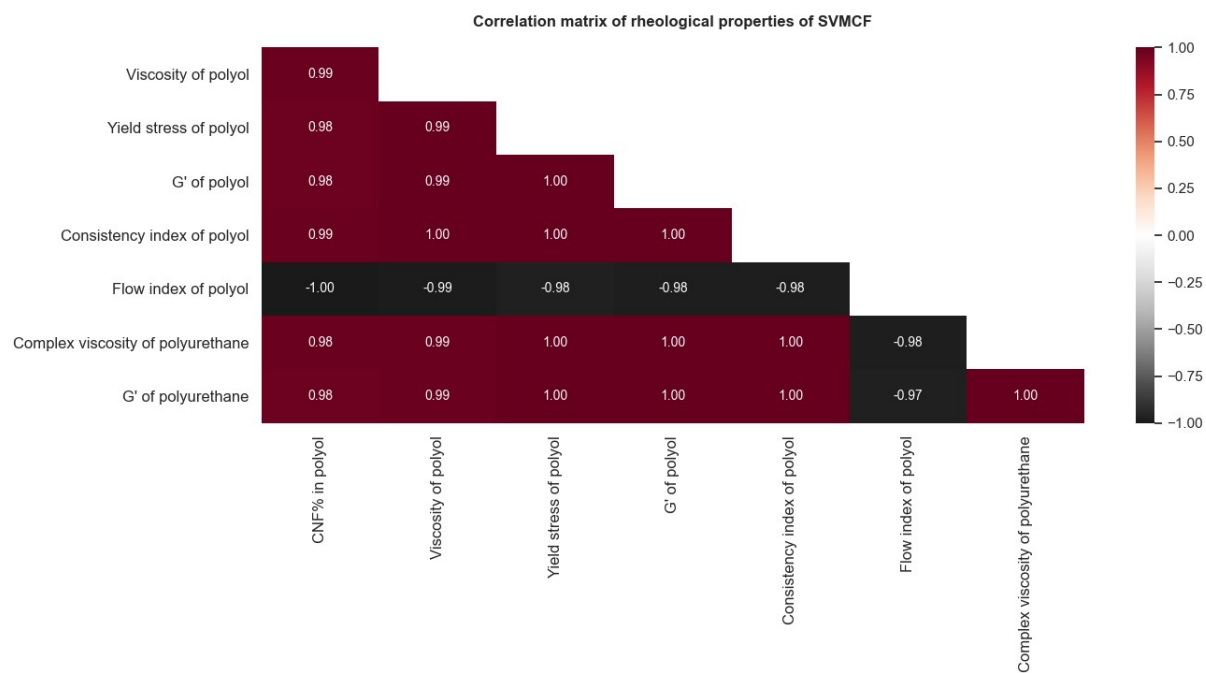

**Figure S.2** Correlation chart of rheological properties of the CNF/polyol dispersions and CNF/polyurethane resins

## S.2 Chemical Aspects of RPUF Samples

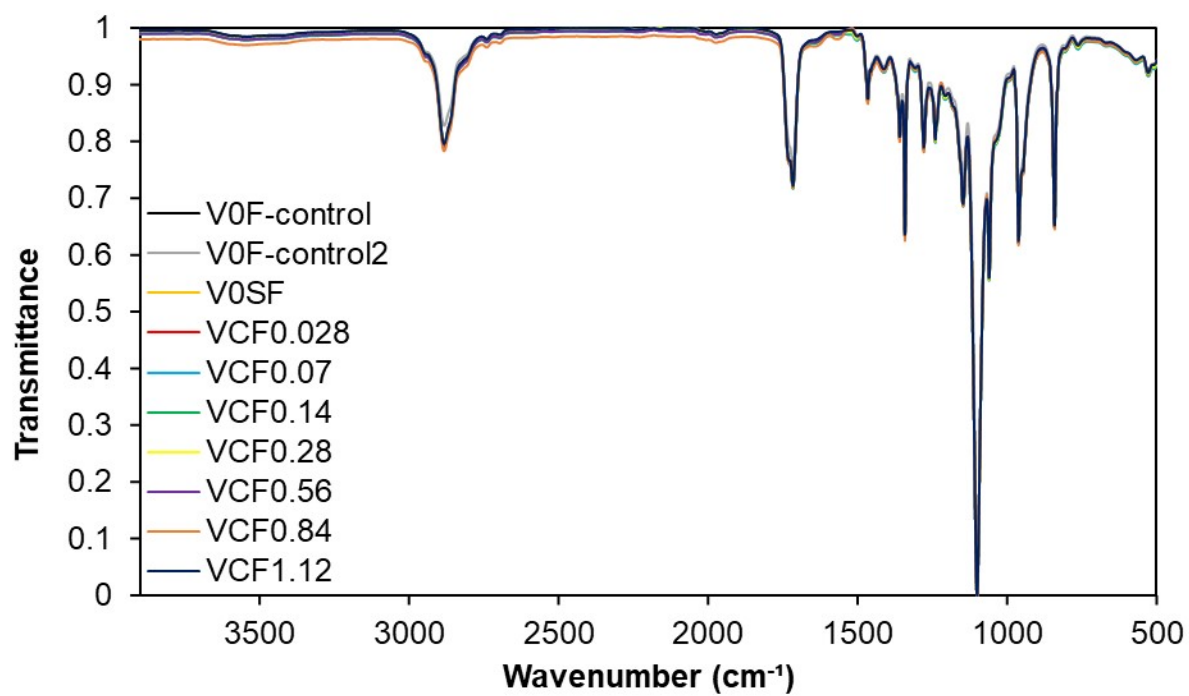

**Figure S.3** FTIR-ATR spectra of RPUF samples

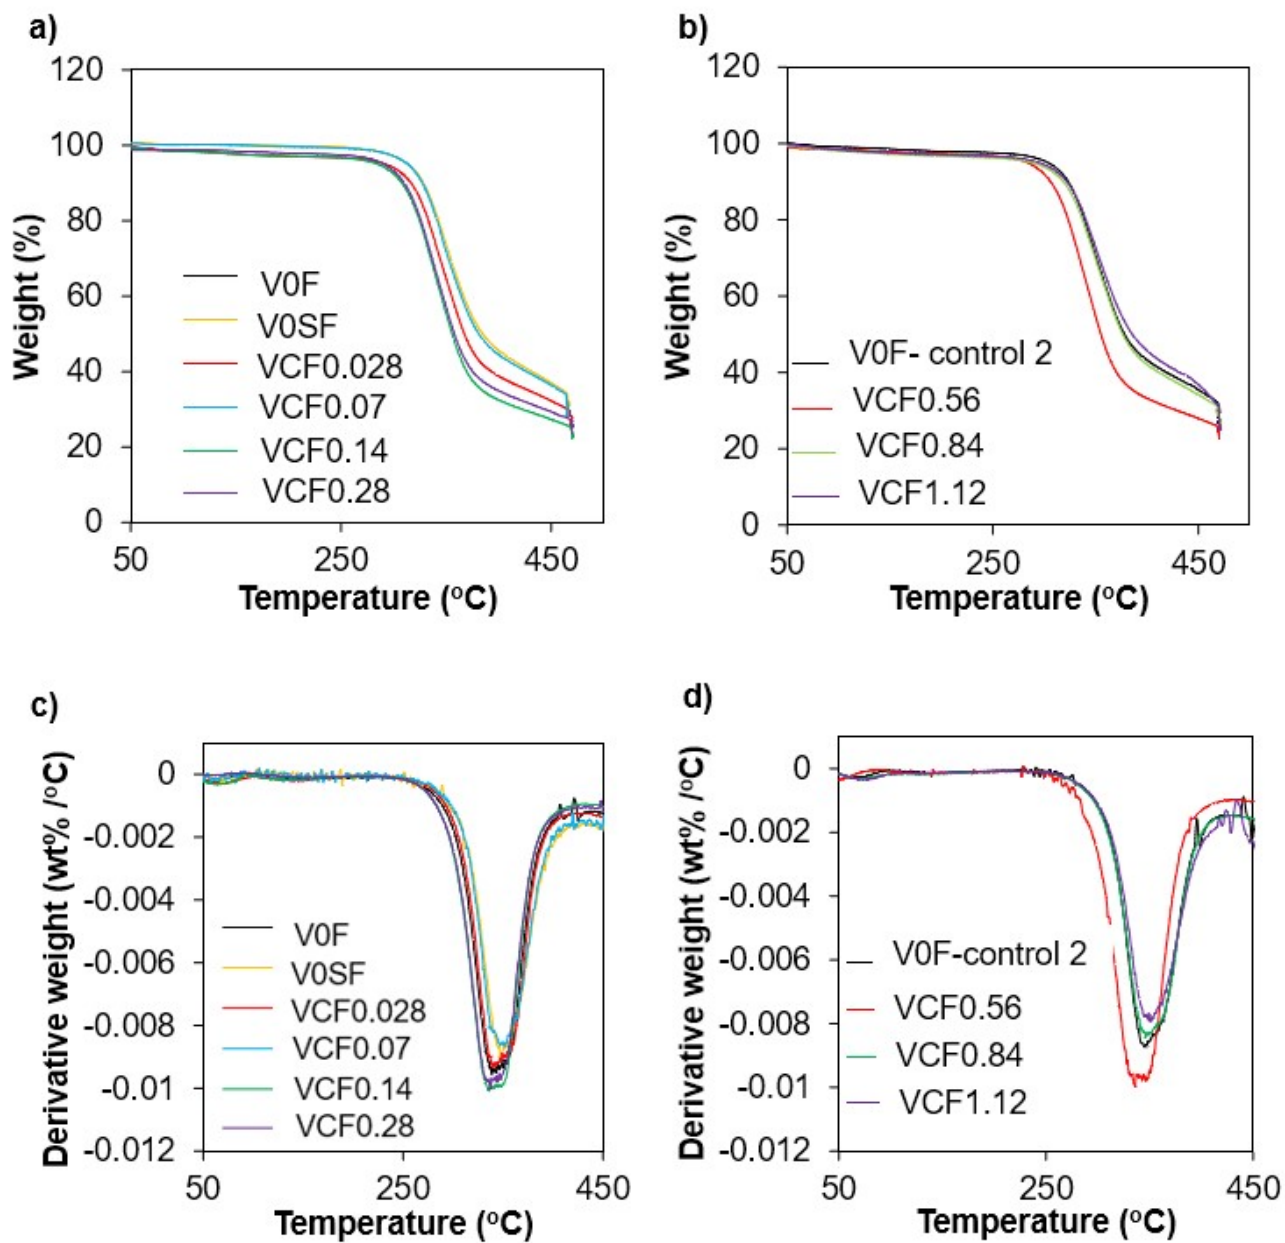

**Figure S.4** Effect of the incorporation of CNF in RPUF on thermal Stability for low-density and high-density CNF/RPUF.

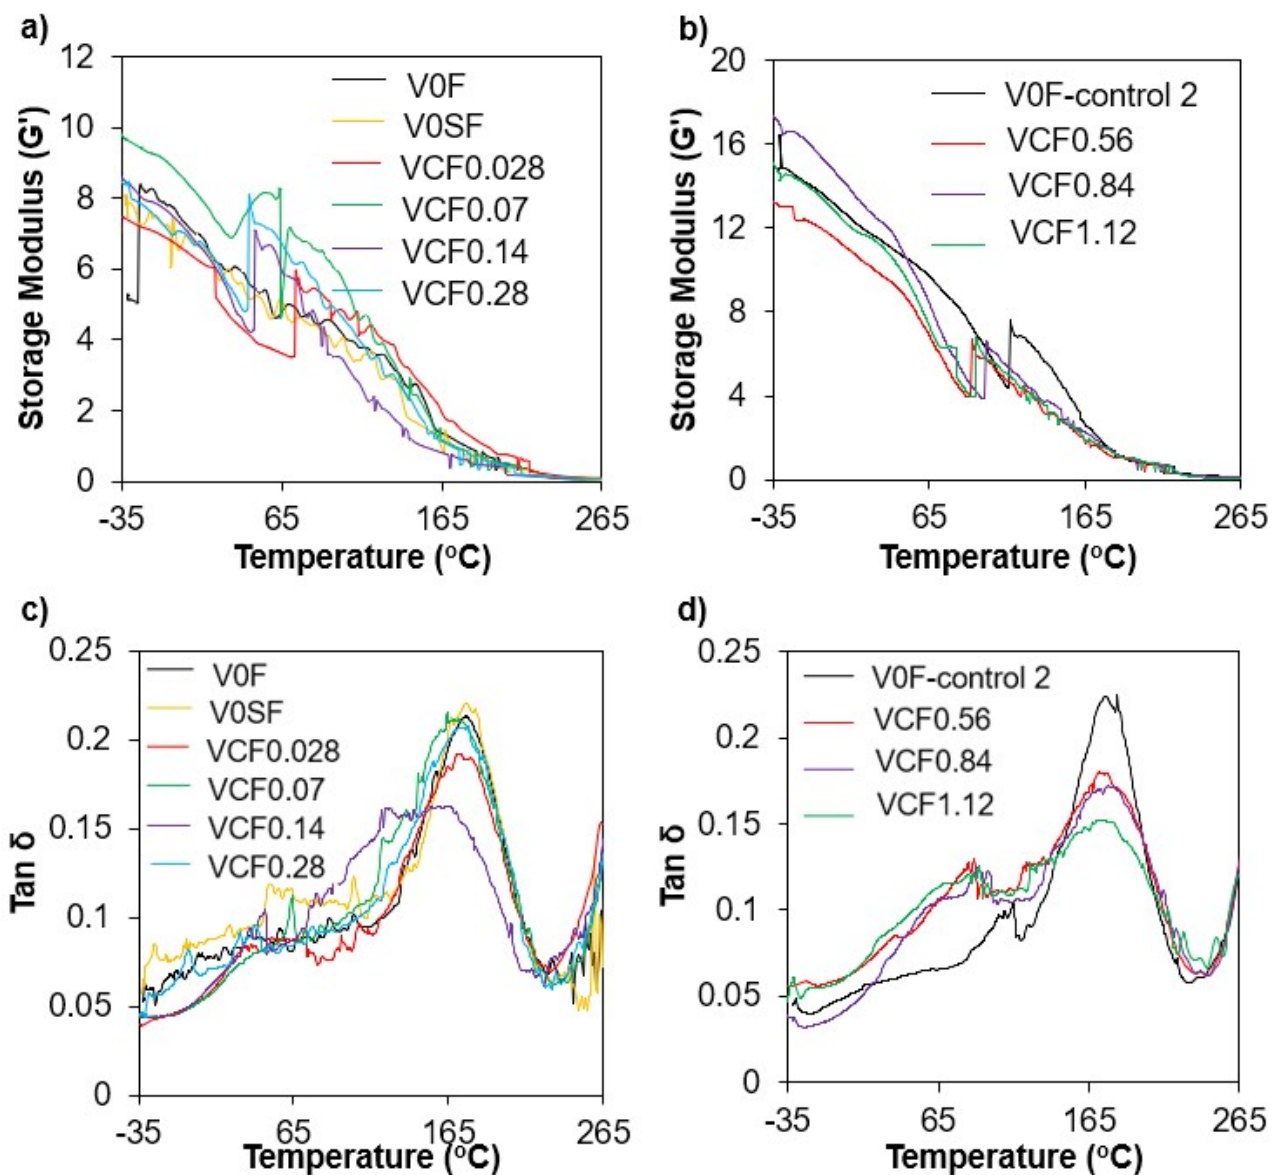

**Figure S.5** Effect of incorporation of CNF in RPUF on thermomechanical properties a), b) storage modulus and c), d) tan  $\delta$  of low-density and high-density CNF/RPUF.

**Table S.1** Hydroxyl value analysis (OHv) of CNF/Polyol Dispersions

| <b>CNF in polyol (w/w%)</b> | 0         | 0*        | 0.028     | 0.07      | 0.14      | 0.28      | 0.56      | 0.84      | 1.12      |
|-----------------------------|-----------|-----------|-----------|-----------|-----------|-----------|-----------|-----------|-----------|
| <b>OHv</b>                  | 448 ± 1.4 | 450 ± 2.5 | 451 ± 5.2 | 450 ± 5.2 | 451 ± 6.3 | 453 ± 2.5 | 453 ± 5.2 | 453 ± 7.6 | 452 ± 5.2 |

\*Control polyol subjected under high shear

### S.3 Microstructural Properties of RPUF Samples

**Key:** YES = Significant difference, NO = Insignificant difference

**Colour code:** Green = Significantly improved, Red = Significantly affected

**Table S.2** Statistical significance of average cell size of low-density and high-density RPUF samples measured using ImageJ from SEM images (n=3 images, number of min-feret measurements= ~25- 75 for all samples) compared to V0F-control and V0F-control 2

| Sample                   | Change (%) |               | Significance |               |
|--------------------------|------------|---------------|--------------|---------------|
|                          | Parallel   | Perpendicular | Parallel     | Perpendicular |
| <b>Low-density RPUF</b>  |            |               |              |               |
| V0F- control             |            |               |              |               |
| V0SF                     | -15.0      | -21.2         | YES          | YES           |
| VCF0.028                 | -54.0      | -47.0         | YES          | YES           |
| VCF0.07                  | -44.6      | -33.7         | YES          | YES           |
| VCF0.14                  | -52.6      | -46.5         | YES          | YES           |
| VCF0.28                  | -45.8      | -38.6         | YES          | YES           |
| <b>High-density RPUF</b> |            |               |              |               |
| V0F-control 2            |            |               |              |               |
| VCF0.56                  | -31.4      | -16.9         | YES          | YES           |
| VCF0.84                  | -30.6      | -18.6         | YES          | YES           |
| VCF1.12                  | -26.4      | 16.0          | YES          | YES           |



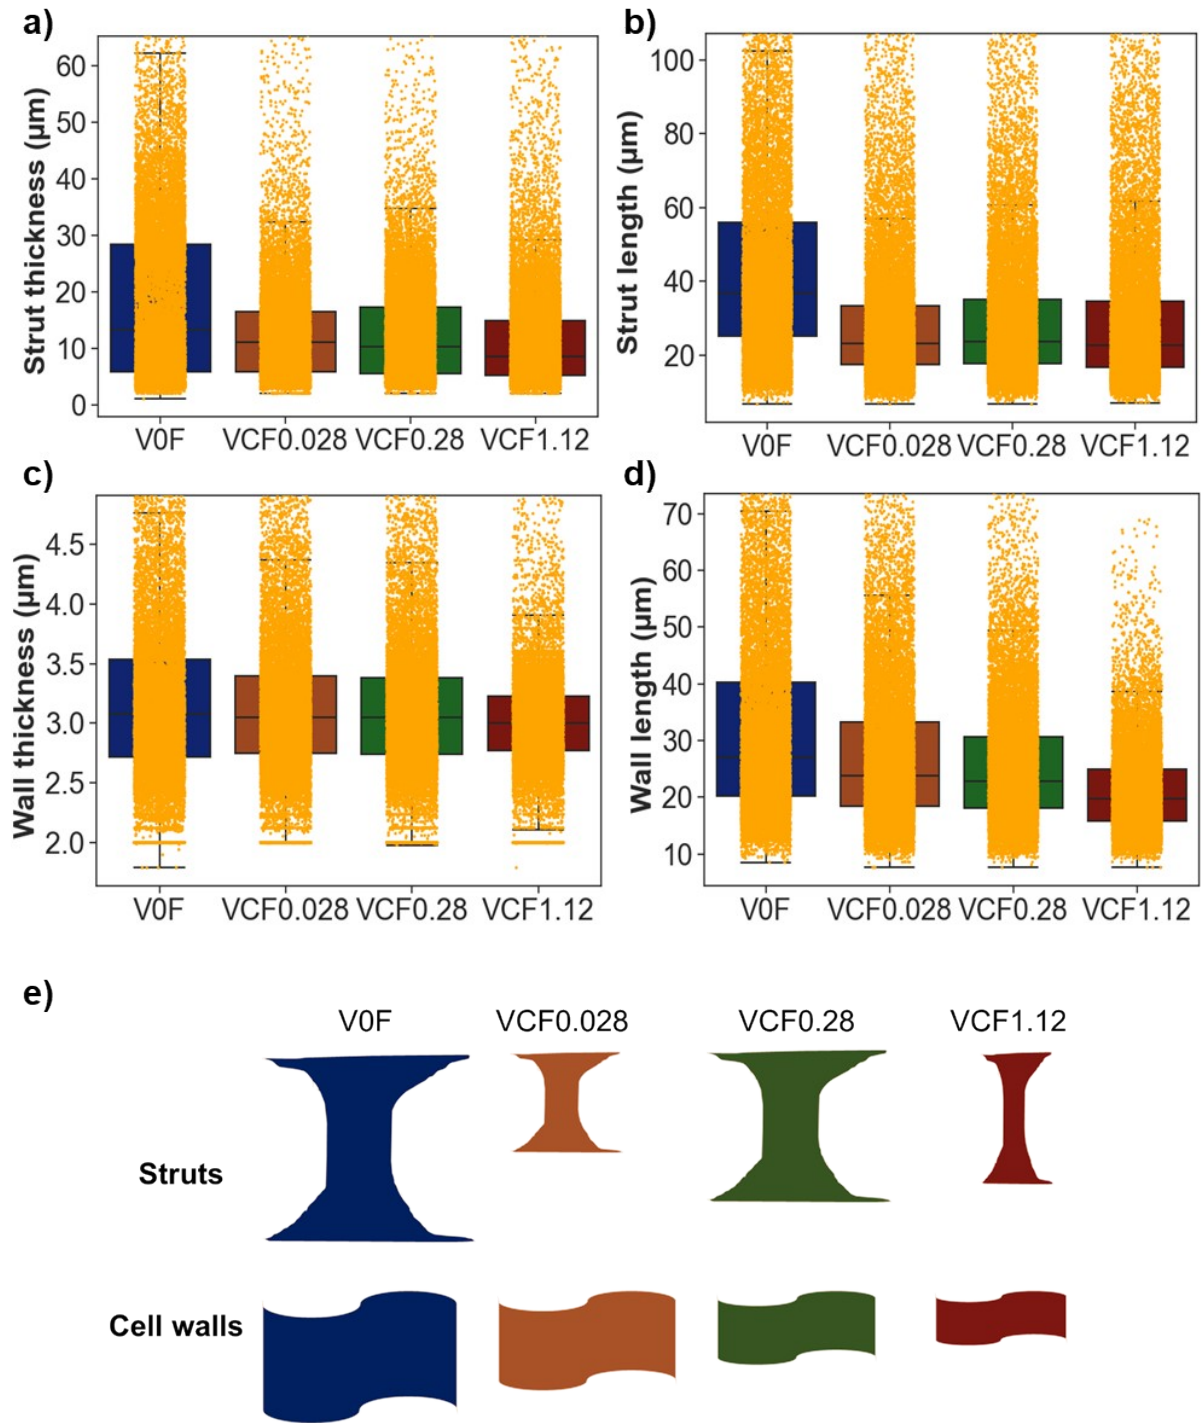

**Figure S.6** The interquartile distribution of a) strut thickness, b) wall thickness, c) strut length, and d) wall length of CNF/RPUF; and e) the schematic representation of possible changes in strut and cell wall upon CNF incorporation based on average values

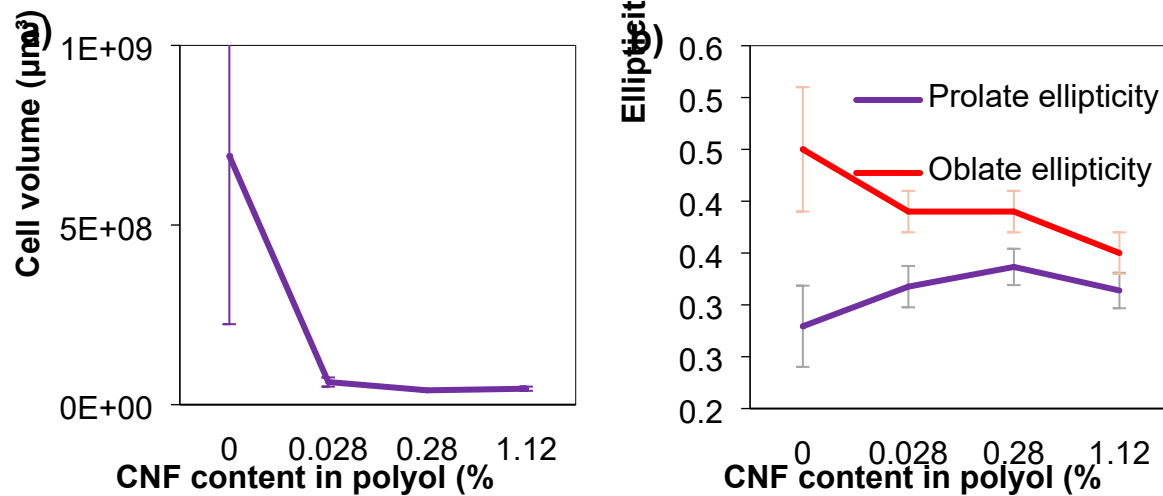

**Figure S.7** Influence of CNF loading on spatial microstructural parameters of RPUF sample

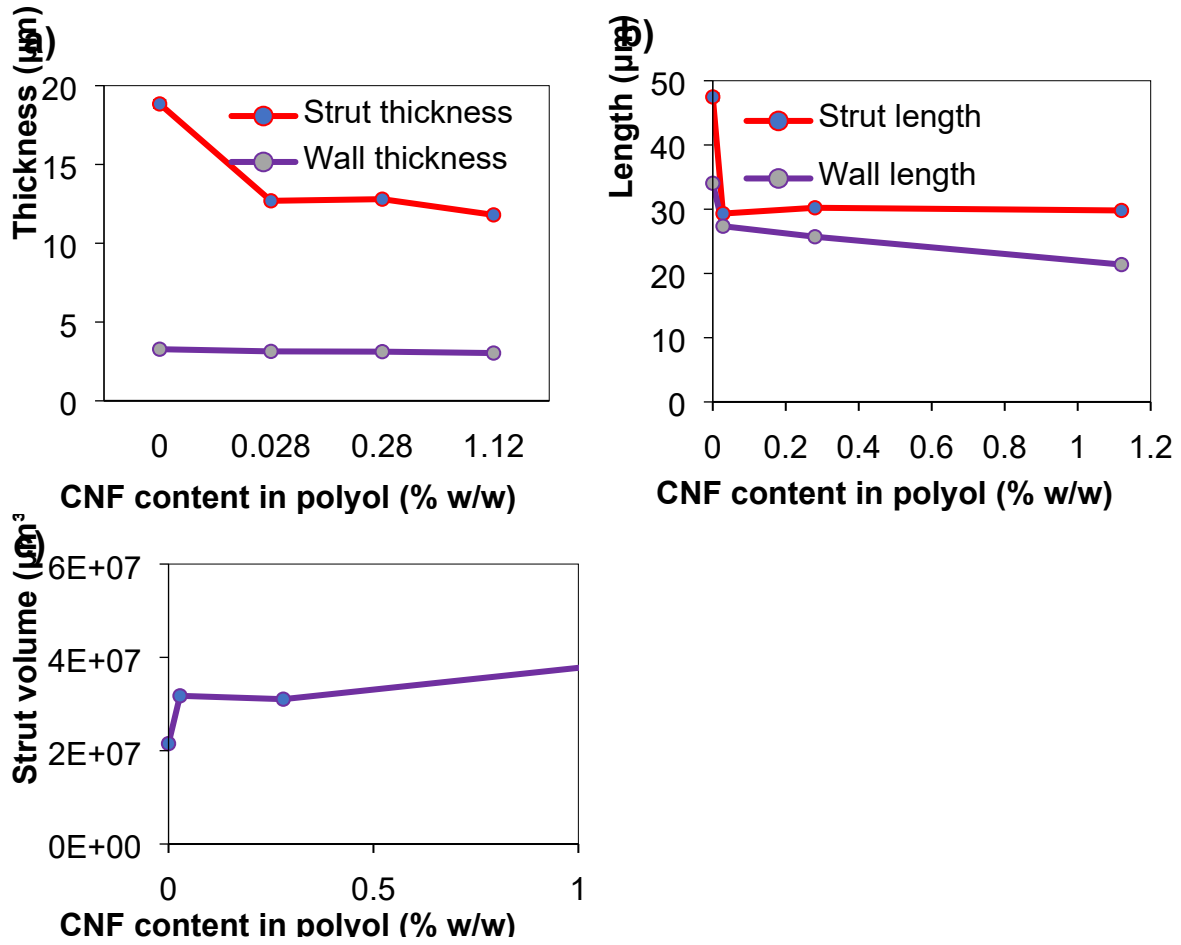

Figure S.8 Influence of CNF loading on skeletal microstructural parameters of RPUF sample

**Table S.3** Statistical significance of spatial parameters measured from 3D reconstruction analysis compared to VOF-control (n= 46 to 300)

| Properties  | Number of cells | Cell volume |              | Prolate ellipticity |              | Oblate ellipticity |              | Sphericity |              |
|-------------|-----------------|-------------|--------------|---------------------|--------------|--------------------|--------------|------------|--------------|
|             |                 | Change (%)  | Significance | Change (%)          | Significance | Change (%)         | Significance | Change (%) | Significance |
| VOF-control | 45              |             |              |                     |              |                    |              |            |              |
| VCF0.028    | 190             | -90.9       | YES          | 13.7                | NO           | -13                | YES          | 4.9        | YES          |
| VCF0.28     | 187             | -94.2       | YES          | 20.5                | YES          | -13.4              | YES          | -0.6       | NO           |
| VCF1.12     | 295             | -93.6       | YES          | 12.4                | NO           | -21.5              | YES          | 3.6        | NO           |

**Table S.4** Significance of Spatial Parameters Measured from 3D reconstruction analysis compared to CNF/RPUF (n= 46 to 300)

| Comparison sample | Sample  | Cell volume | Sphericity | Prolate ellipticity | Oblate ellipticity |
|-------------------|---------|-------------|------------|---------------------|--------------------|
| VCF0.028          | VCF0.28 | NO          | NO         | NO                  | YES                |
|                   | VCF1.12 | NO          | NO         | NO                  | YES                |
| VCF0.28           | VCF1.12 | YES         | NO         | NO                  | YES                |

**Table S.5** Significance of Skeletal Parameters Measured from 2D reconstruction analysis compared to V0F-control (n= 16001 to 260000)

| Properties   | Strut length |              | Strut thickness |              | Wall length |              | Wall thickness |              |
|--------------|--------------|--------------|-----------------|--------------|-------------|--------------|----------------|--------------|
|              | Change (%)   | Significance | Change (%)      | Significance | Change (%)  | Significance | Change (%)     | Significance |
| V0F- control |              |              |                 |              |             |              |                |              |
| VCF0.028     | -38.2        | YES          | -32.6           | YES          | -19.6       | YES          | -4.2           | YES          |
| VCF0.28      | -36.3        | YES          | -32.1           | YES          | -24.4       | YES          | -4.7           | YES          |
| VCF1.12      | -37.2        | YES          | -37.4           | YES          | -37.2       | YES          | -7.5           | YES          |

**Table S.6** Significance of Skeletal Parameters Measured from 2D reconstruction analysis compared to CNF/RPUF (n= 160001 to 260000)

| Comparison sample | Sample  | Strut thickness | Strut length | Wall length | Wall thickness |
|-------------------|---------|-----------------|--------------|-------------|----------------|
| VCF0.028          | VCF0.28 | NO              | YES          | YES         | NO             |
|                   | VCF1.12 | NO              | YES          | YES         | NO             |
| VCF0.28           | VCF1.12 | NO              | NO           | YES         | NO             |

## S.4 Statistical Significance of Physical Properties of RPUF Samples

**Table S.7** Statistical significance of compressive properties of low-density and high-density RPUF compared to V0F-control and V0F-control 2 respectively (n=6)

|                                        | Density    |              | CS         |              | Sp. CS     |              | CM         |              | Sp. CM     |              |
|----------------------------------------|------------|--------------|------------|--------------|------------|--------------|------------|--------------|------------|--------------|
|                                        | Change (%) | Significance |
| <b>Low-density RPUF -Parallel</b>      |            |              |            |              |            |              |            |              |            |              |
| V0F- control                           |            |              |            |              |            |              |            |              |            |              |
| V0SF                                   | -5.6       | YES          | -16.8      | YES          | -12.0      | NO           | -10.9      | NO           | -5.8       | NO           |
| VCF0.028                               | 19.3       | YES          | 2.0        | NO           | -14.7      | NO           | 11.0       | NO           | -7.2       | NO           |
| VCF0.07                                | 16.3       | YES          | 9.9        | NO           | -5.6       | NO           | 28.3       | YES          | 10.2       | NO           |
| VCF0.14                                | 22.4       | YES          | 11.9       | NO           | -8.7       | NO           | 29.6       | NO           | 5.8        | NO           |
| VCF0.28                                | 21.4       | YES          | 12.9       | NO           | -6.9       | NO           | 32.2       | YES          | 16.4       | NO           |
| <b>Low-density RPUF -Perpendicular</b> |            |              |            |              |            |              |            |              |            |              |
| V0F- control                           |            |              |            |              |            |              |            |              |            |              |
| V0SF                                   | -1.55      | NO           | -3.9       | NO           | -1.3       | NO           | 10.0       | NO           | 12.9       | NO           |
| VCF0.028                               | 20.23      | YES          | 50.6       | YES          | 25.2       | YES          | 88.2       | YES          | 56.5       | YES          |
| VCF0.07                                | 16.67      | YES          | 42.9       | YES          | 22.4       | YES          | 64.8       | YES          | 41.3       | YES          |
| VCF0.14                                | 23.54      | YES          | 46.8       | YES          | 18.7       | YES          | 74.7       | YES          | 41.4       | YES          |
| VCF0.28                                | 24.38      | YES          | 49.4       | YES          | 20.0       | YES          | 67.3       | YES          | 34.5       | YES          |
| <b>High-density RPUF -Parallel</b>     |            |              |            |              |            |              |            |              |            |              |
| V0F-control                            |            |              |            |              |            |              |            |              |            |              |

2

|         |      |     |       |     |       |     |       |    |       |    |
|---------|------|-----|-------|-----|-------|-----|-------|----|-------|----|
| VCF0.56 | -6.4 | YES | -24.7 | YES | -19.4 | YES | -21.1 | NO | -15.6 | NO |
| VCF0.84 | 11.2 | YES | -14.9 | NO  | -23.4 | YES | -13.3 | NO | -21.9 | NO |
| VCF1.12 | 12.4 | YES | -16.7 | NO  | -25.9 | YES | -17.3 | NO | -26.5 | NO |

**High-density RPUF -Perpendicular**

V0F-control

2

|         |      |     |       |     |       |     |       |     |       |     |
|---------|------|-----|-------|-----|-------|-----|-------|-----|-------|-----|
| VCF0.56 | -4.4 | YES | -31.6 | YES | -28.5 | YES | -31.4 | YES | -28.2 | YES |
| VCF0.84 | 14.2 | YES | -17.7 | YES | -27.9 | YES | -16.6 | YES | -27.0 | YES |
| VCF1.12 | 13.2 | YES | -13.4 | YES | -23.5 | YES | -10.8 | YES | -21.2 | YES |

---

Footnotes: CS= compressive strength, Sp. CS= Specific compressive strength, CM= compressive modulus, Sp. CM= Specific compressive modulus

---

**Table S.8** Statistical significance of compressive properties of low-density RPUF samples compared to V0SF (n=6)

|                                        | Density    |              | CS         |              | Sp. CS     |              | CM         |              | Sp. CM     |              |
|----------------------------------------|------------|--------------|------------|--------------|------------|--------------|------------|--------------|------------|--------------|
|                                        | Change (%) | Significance |
| <b>Low-density RPUF -Parallel</b>      |            |              |            |              |            |              |            |              |            |              |
| V0F-control                            | 6.0        | YES          | 20.2       | YES          | 13.6       | NO           | 12.2       | NO           | 6.1        | NO           |
| V0SF                                   |            |              |            |              |            |              |            |              |            |              |
| VCF0.028                               | 26.4       | YES          | 22.6       | NO           | -3.1       | NO           | 24.5       | NO           | -1.5       | NO           |
| VCF0.07                                | 23.2       | YES          | 32.1       | YES          | 7.2        | NO           | 44.0       | YES          | 17.0       | NO           |
| VCF0.14                                | 29.7       | YES          | 34.5       | YES          | 3.7        | NO           | 45.4       | YES          | 12.2       | NO           |
| VCF0.28                                | 28.6       | YES          | 35.7       | YES          | 5.7        | NO           | 48.3       | YES          | 23.5       | NO           |
| <b>Low-density RPUF -Perpendicular</b> |            |              |            |              |            |              |            |              |            |              |
| V0F-control                            | 1.6        | NO           | 4.1        | NO           | 1.3        | NO           | -9.1       | NO           | -11.4      | NO           |
| V0SF                                   |            |              |            |              |            |              |            |              |            |              |
| VCF0.028                               | 22.1       | YES          | 56.8       | YES          | 26.9       | YES          | 71.2       | YES          | 38.6       | YES          |
| VCF0.07                                | 18.5       | YES          | 48.6       | YES          | 24.0       | YES          | 49.8       | YES          | 25.1       | YES          |
| VCF0.14                                | 25.5       | YES          | 52.7       | YES          | 20.3       | NO           | 58.9       | YES          | 25.2       | YES          |
| VCF0.28                                | 26.3       | YES          | 55.4       | YES          | 21.6       | NO           | 52.1       | YES          | 19.1       | NO           |

Footnotes: CS= compressive strength, Sp. CS= Specific compressive strength, CM= compressive modulus, Sp. CM= Specific compressive modulus



**Table S.9** Statistical significance of thermal conductivity of low- density and high density RPUF samples (n=3) in comparison to V0F- control and V0F- control 2 respectively at 1 month and 6 months

| Sample in comparison with control | Significance | Percentage of change | Significance | Percentage of change |
|-----------------------------------|--------------|----------------------|--------------|----------------------|
| <b>Months</b>                     |              | 1                    |              | 6                    |
| <b>Low-density RPUF</b>           |              |                      |              |                      |
| V0F- control                      |              |                      |              |                      |
| V0SF                              | YES          | 16                   | YES          | 14                   |
| VCF0.028                          | YES          | -20                  | YES          | -15                  |
| VCF0.07                           | NO           | -5                   | NO           | -2                   |
| VCF0.14                           | YES          | -19                  | YES          | -17                  |
| VCF0.28                           | YES          | -10                  | NO           | -6                   |
| <b>High-density RPUF</b>          |              |                      |              |                      |
| V0F-control 2                     |              |                      |              |                      |
| VCF0.56                           | YES          | -18                  | NO           | -16                  |
| VCF0.84                           | NO           | -17                  | NO           | -15                  |
| VCF1.12                           | NO           | -16                  | NO           | -14                  |

**Table S.10** Statistical significance of thermal conductivity of low- density RPUF samples (n=3) in comparison to V0SF respectively at 1 month and 6 months

| <b>Sample in comparison with V0SF</b> | <b>Significance</b> | <b>Percentage of change</b> | <b>Significance</b> | <b>Percentage of change</b> |
|---------------------------------------|---------------------|-----------------------------|---------------------|-----------------------------|
| <b>Months</b>                         |                     | 1                           |                     | 6                           |
| <b>Low-density RPUF</b>               |                     |                             |                     |                             |
| V0F- control<br>V0SF                  | -14                 | YES                         | -12                 | YES                         |
| VCF0.028                              | -31                 | YES                         | -26                 | YES                         |
| VCF0.07                               | -18                 | NO                          | -14                 | NO                          |
| VCF0.14                               | -30                 | YES                         | -28                 | YES                         |
| VCF0.28                               | -22                 | YES                         | -18                 | NO                          |

**Table S.11** Statistical significance of thermal conductivity of RPUF samples (n=3) comparison before and after ageing

| <b>Sample</b>            | <b>Percentage of change</b> | <b>Significance</b> |
|--------------------------|-----------------------------|---------------------|
| <b>Low-density RPUF</b>  |                             |                     |
| V0F- control             | 7.25                        | YES                 |
| V0SF                     | 5.52                        | NO                  |
| VCF0.028                 | 12.81                       | NO                  |
| VCF0.07                  | 10.71                       | NO                  |
| VCF0.14                  | 9.68                        | NO                  |
| VCF0.28                  | 12.1116                     | NO                  |
| <b>High-density RPUF</b> |                             |                     |
| V0F-control 2            | 6.37321                     | NO                  |
| VCF0.56                  | 9.3715                      | YES                 |
| VCF0.84                  | 9.5328                      | YES                 |
| VCF1.12                  | 9.9088                      | YES                 |

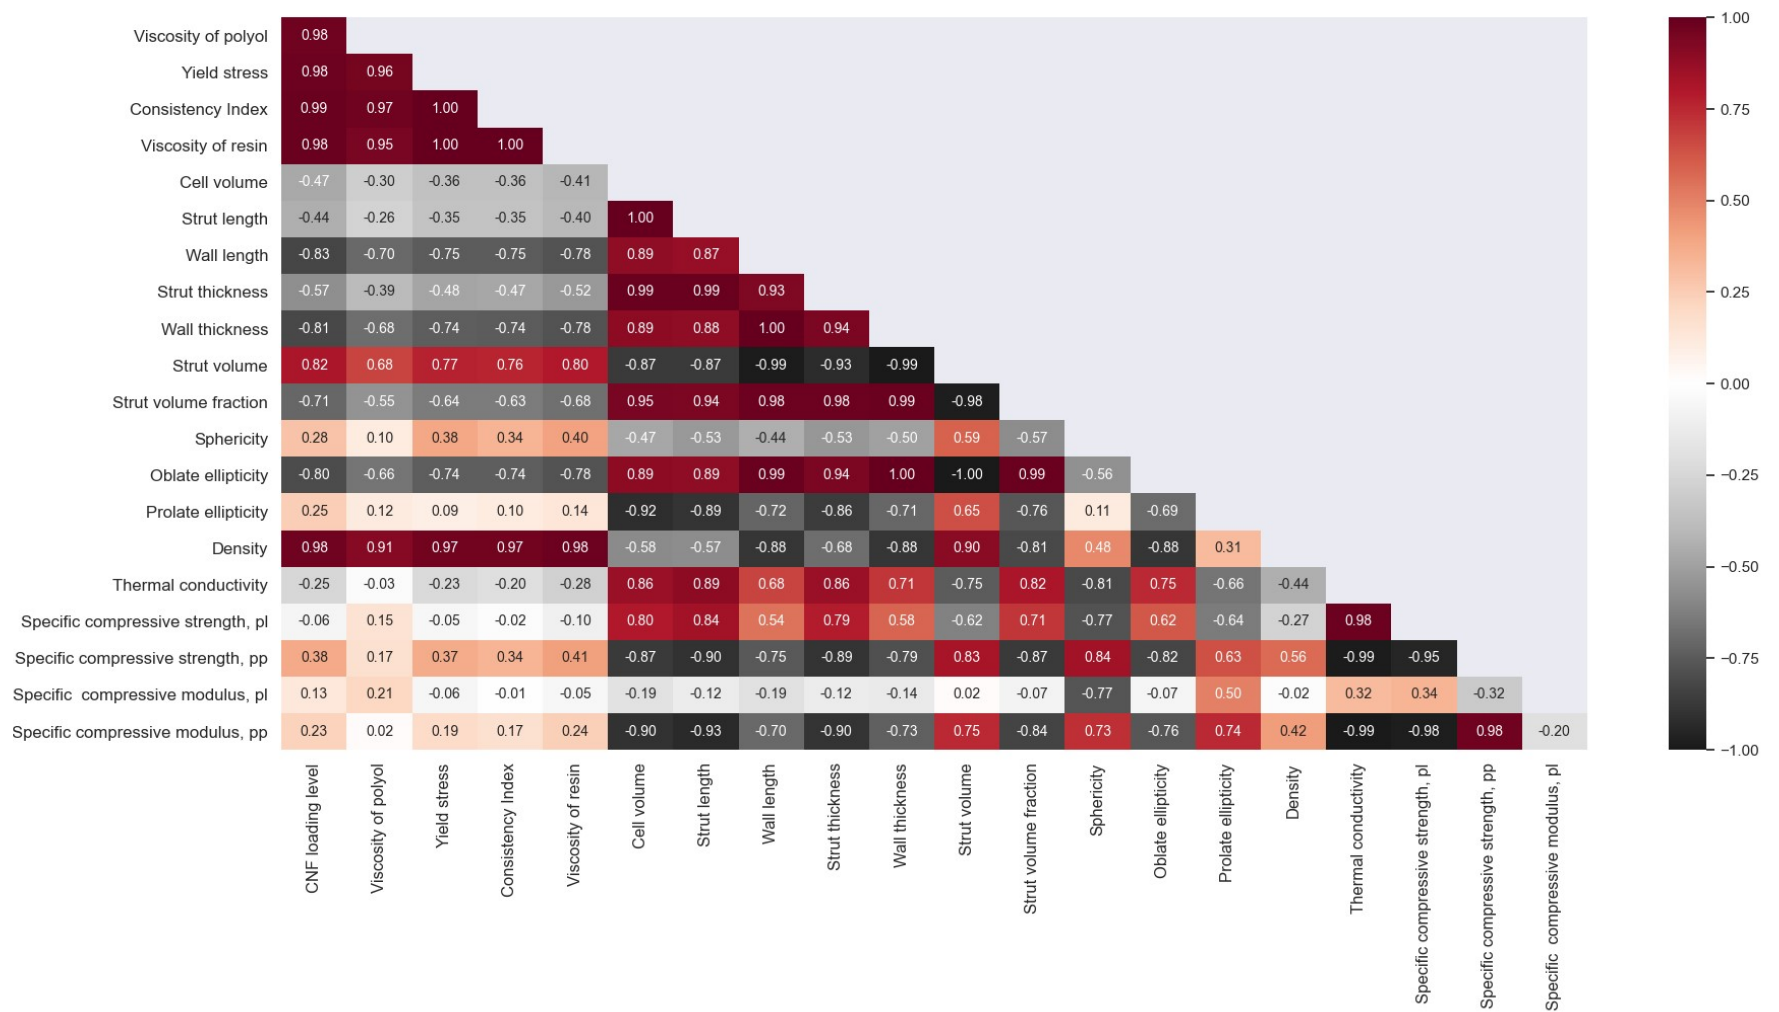

**Figure S.9** Correlation of rheological properties of CNF/polyol dispersions and CNF/polyurethane resins with the microstructural and physical properties of the CNF/RPUF

| Sample                                | V0F-control | V0SF       | VCF0.028   | VCF0.07    | VCF0.14    | VCF0.28    | V0F-control 2 | VCF0.56    | VCF0.84    | VCF1.12    |
|---------------------------------------|-------------|------------|------------|------------|------------|------------|---------------|------------|------------|------------|
| <i>Properties</i>                     |             |            |            |            |            |            |               |            |            |            |
| Core density (kg/m <sup>3</sup> )     | 32.7 ± 2.3  | 31.0 ± 2.4 | 39.3 ± 3.1 | 37.9 ± 2.2 | 39.5 ± 2.0 | 40.5 ± 4.3 | 55.6 ± 1.8    | 53.2 ± 3.5 | 62.3 ± 2.7 | 63.1 ± 3.0 |
| Average cell size diameter (μm) (  )* | 669 ± 59    | 569 ± 57   | 308 ± 30   | 371 ± 15   | 317 ± 11   | 362 ± 15   | 453 ± 24      | 311 ± 14   | 314 ± 15   | 334 ± 17   |
| Average cell size diameter (μm) (⊥)*  | 663 ± 75    | 522 ± 26   | 351 ± 21   | 440 ± 27   | 355 ± 13   | 407 ± 19   | 415 ± 26      | 345 ± 16   | 337 ± 18   | 481 ± 28   |

\*Data from SEM,  $\lambda$  = Thermal conductivity, || = parallel to rise,  $\perp$  = perpendicular to rise, and RT = room temperature.

### S.5 Microstructural parameters of CNF/RPUF samples
